# **Ninety-nine independent genetic loci influencing general cognitive function include genes associated with brain health and structure (N = 280,360)**

Gail Davies<sup>1,181</sup>, Max Lam<sup>2,181</sup>, Sarah E Harris<sup>1,3</sup>, Joey W Trampush<sup>4</sup>, Michelle Luciano<sup>1</sup>, W David Hill<sup>1</sup>, Saskia PHagenaars<sup>1,5</sup>, Stuart J Ritchie<sup>1</sup>, Riccardo E Marioni<sup>1,3</sup>, Chloe Fawns-Ritchie<sup>1</sup>, David CM Liewald<sup>1</sup>, Judith A Okely<sup>1</sup>, Ari V Ahola-Olli<sup>6,7</sup>, Catriona LK Barnes<sup>8</sup>, Lars Bertram<sup>9</sup>, Joshua C Bis<sup>10</sup>, Katherine E Burdick<sup>11,12,13</sup>, Andrea Christoforou<sup>14,15</sup>, Pamela DeRosse<sup>2,16</sup>, Srdjan Djurovic<sup>14,17</sup>, Thomas Espeseth<sup>18,19</sup>, Stella Giakoumaki<sup>20</sup>, Sudheer Giddaluru<sup>14,15</sup>, Daniel E Gustavson<sup>21,22</sup>, Caroline Hayward<sup>23,24</sup>, Edith Hofer<sup>25,26</sup>, M Arfan Ikram<sup>27,28,29</sup>, Robert Karlsson<sup>30</sup>, Emma Knowles<sup>31</sup>, Jari Lahti<sup>32,33</sup>, Markus Leber<sup>34</sup>, Shuo Li<sup>35</sup>, Karen A Mather<sup>36</sup>, Ingrid Melle<sup>14,18</sup>, Derek Morris<sup>37</sup>, Christopher Oldmeadow<sup>38</sup>, Teemu Palviainen<sup>39</sup>, Antony Payton<sup>40</sup>, Raha Pazoki<sup>41</sup>, Katja Petrovic<sup>25</sup>, Chandra A Reynolds<sup>42</sup>, Muralidharan Sargurupremraj<sup>43</sup>, Markus Scholz<sup>44,45</sup>, Jennifer A Smith<sup>46,47</sup>, Albert V Smith<sup>48,49</sup>, Natalie Terzikhan<sup>27,50</sup>, Anbu Thalamuthu<sup>36</sup>, Stella Trompet<sup>51</sup>, Sven J van der Lee<sup>27</sup>, Erin B Ware<sup>47</sup>, B Gwen Windham<sup>52</sup>, Margaret J Wright<sup>53,54</sup>, Jingyun Yang<sup>55,56</sup>, Jin Yu<sup>16</sup>, David Ames<sup>57,58</sup>, Najaf Amin<sup>27</sup>, Philippe Amouyel<sup>59</sup>, Ole A Andreassen<sup>18,62</sup>, Nicola J Armstrong<sup>63</sup>, Amelia A Assareh<sup>36</sup>, John R Attia<sup>64</sup>, Deborah Attix<sup>65,66</sup>, Dimitrios Avramopoulos<sup>67,68</sup>, David A Bennett<sup>55,56</sup>, Anne C Böhmer<sup>69,70</sup>, Patricia A Boyle<sup>55,71</sup>, Henry Brodaty<sup>36,72</sup>, Harry Campbell<sup>8</sup>, Tyrone D Cannon<sup>73</sup>, Elizabeth T Cirulli<sup>74</sup>, Eliza Congdon<sup>75</sup>, Emily Drabant Conley<sup>76</sup>, Janie Corley<sup>1</sup>, Simon R Cox<sup>1</sup>, Anders M Dale<sup>21,77,78,79</sup>, Abbas Dehghan<sup>41,80</sup>, Danielle Dick<sup>81</sup>, Dwight Dickinson<sup>82</sup>, Johan G Eriksson<sup>83,84,85,86</sup>, Evangelos Evangelou<sup>41,83</sup>, Jessica D Faul<sup>47</sup>, Ian Ford<sup>88</sup>, Nelson A Freimer<sup>75</sup>, He Gao<sup>41</sup>, Ina Giegling<sup>89</sup>, Nathan A Gillespie<sup>90</sup>, Scott D Gordon<sup>91</sup>, Rebecca F Gottesman<sup>92,93</sup>, Michael E Griswold<sup>94</sup>, Vilmundur Gudnason<sup>48,49</sup>, Tamara B Harris<sup>95</sup>, Annette M Hartmann<sup>89</sup>, Alex Hatzimanolis<sup>96,97,98</sup>, Gerardo Heiss<sup>99</sup>, Elizabeth G Holliday<sup>64</sup>, Peter K Joshi<sup>8</sup>, Mika Kähönen<sup>100,101</sup>, Sharon LR Kardina<sup>46</sup>, Ida Karlsson<sup>30</sup>, Luca Kleindam<sup>60,102,150</sup>, David S Knopman<sup>103</sup>, Nicole A Kochan<sup>36,104</sup>, Bettina Konte<sup>89</sup>, John B Kwok<sup>105,106</sup>, Stephanie Le Hellard<sup>14,15</sup>, Teresa Lee<sup>36,104</sup>, Terho Lehtimäki<sup>107,108</sup>, Shu-Chen Li<sup>109,110</sup>, Tian Liu<sup>9,109</sup>, Marisa Koini<sup>25</sup>, Edythe

London<sup>75</sup>, Will T Longstreth, Jr<sup>111,112</sup>, Oscar L Lopez<sup>113</sup>, Anu Loukola<sup>39</sup>, Tobias Luck<sup>114,45</sup>, Astri J Lundervold<sup>116,14</sup>, Anders Lundquist<sup>117,118</sup>, Leo-Pekka Lyytikäinen<sup>107,108</sup>, Nicholas G Martin<sup>91</sup>, Grant W Montgomery<sup>91,119</sup>, Alison D Murray<sup>120,24</sup>, Anna C Need<sup>121</sup>, Raymond Noordam<sup>51</sup>, Lars Nyberg<sup>117,122,123</sup>, William Ollier<sup>124</sup>, Goran Papenberg<sup>109,125</sup>, Alison Pattie<sup>126</sup>, Ozren Polasek<sup>61,127</sup>, Russell A Poldrack<sup>128</sup>, Bruce M Psaty<sup>10, 130,131</sup>, Simone Reppermund<sup>36,179</sup>, Steffi G Riedel-Heller<sup>114</sup>, Richard J Rose<sup>132</sup>, Jerome I Rotter<sup>133,134</sup>, Panos Roussos<sup>11,135,136</sup>, Suvi P Rovio<sup>6</sup>, Yasaman Saba<sup>137</sup>, Fred W Sabb<sup>138</sup>, Perminder S Sachdev<sup>36,104</sup>, Claudia Satizabal<sup>139</sup>, Matthias Schmid<sup>140</sup>, Rodney J Scott<sup>64</sup>, Matthew A Scult<sup>141</sup>, Jeannette Simino<sup>94</sup>, P Eline Slagboom<sup>142</sup>, Nikolaos Smyrnis<sup>96,97</sup>, Aïcha Soumaré<sup>43</sup>, Nikos C Stefanis<sup>96,97,98</sup>, David J Stott<sup>143</sup>, Richard E Straub<sup>144</sup>, Kjetil Sundet<sup>18,19</sup>, Adele M Taylor<sup>126</sup>, Kent D Taylor<sup>133,134</sup>, Ioanna Tzoulaki<sup>41,80,145</sup>, Christophe Tzourio<sup>43,146</sup>, André Uitterlinden<sup>27,147</sup>, Veronique Vitart<sup>23</sup>, Aristotle N Voineskos<sup>148</sup>, Jaakko Kaprio<sup>39,83,149</sup>, Michael Wagner<sup>102,150</sup>, Holger Wagner<sup>102</sup>, Leonie Weinhold<sup>140</sup>, K Hoyan Wen<sup>27</sup>, Elisabeth Widen<sup>39</sup>, Qiong Yang<sup>35</sup>, Wei Zhao<sup>46</sup>, Hieab HH Adams<sup>27,180</sup>, Dan E Arking<sup>67,68</sup>, Robert M Bilder<sup>75</sup>, Panos Bitsios<sup>152</sup>, Eric Boerwinkle<sup>153,154</sup>, Ornit Chiba-Falek<sup>65</sup>, Aiden Corvin<sup>155</sup>, Philip L De Jager<sup>156,157</sup>, Stéphanie Debette<sup>43,158</sup>, Gary Donohoe<sup>159</sup>, Paul Elliott<sup>41,80</sup>, Annette L Fitzpatrick<sup>112,160</sup>, Michael Gill<sup>155</sup>, David C Glahn<sup>31</sup>, Sara Hägg<sup>30</sup>, Narelle K Hansell<sup>53</sup>, Ahmad R Hariri<sup>141</sup>, M Kamran Ikram<sup>27,29</sup>, J. Wouter Jukema<sup>161</sup>, Eero Vuoksimaa<sup>39,149</sup>, Matthew C Keller<sup>162</sup>, William S Kremen<sup>21,22</sup>, Lenore Launer<sup>95</sup>, Ulman Lindenberger<sup>109</sup>, Aarno Palotie<sup>39,163,164</sup>, Nancy L Pedersen<sup>30</sup>, Neil Pendleton<sup>165</sup>, David J Porteous<sup>1,3,24</sup>, Katri Räikkönen<sup>32</sup>, Olli T Raitakari<sup>6,166</sup>, Alfredo Ramirez<sup>34,69,102</sup>, Ivar Reinvang<sup>19</sup>, Igor Rudan<sup>8</sup>, Dan Rujescu<sup>89</sup>, Reinhold Schmidt<sup>25</sup>, Helena Schmidt<sup>137</sup>, Peter W Schofield<sup>167</sup>, Peter R Schofield<sup>168,169</sup>, John M Starr<sup>170,1</sup>, Vidar M Steen<sup>14,15</sup>, Julian N Trollor<sup>36,179</sup>, Steven T Turner<sup>171</sup>, Cornelia M Van Duijn<sup>27</sup>, Arno Villringer<sup>172,173</sup>, Daniel R Weinberger<sup>144</sup>, David R Weir<sup>47</sup>, James F Wilson<sup>8,23</sup>, Anil Malhotra<sup>16,174,175</sup>, Andrew M McIntosh<sup>1,176</sup>, Catharine R Gale<sup>1,177</sup>, Sudha Seshadri<sup>139,178</sup>, Thomas H Mosley, Jr.<sup>52</sup>, Jan Bressler<sup>153</sup>, Todd Lencz<sup>16,175,182</sup>, Ian J Deary<sup>1,182</sup>

<sup>1</sup>Centre for Cognitive Ageing and Cognitive Epidemiology, Department of Psychology, School of Philosophy, Psychology and Language Sciences, The University of Edinburgh, Edinburgh, UK

<sup>2</sup>Institute of Mental Health, Singapore

<sup>3</sup>Medical Genetics Section, Centre for Genomic & Experimental Medicine, MRC Institute of Genetics & Molecular Medicine, University of Edinburgh, Western General Hospital, Edinburgh, UK.

<sup>4</sup>BrainWorkup, LLC, Los Angeles, CA

<sup>5</sup>MRC Social, Genetic and Developmental Psychiatry Centre, Institute of Psychiatry, Psychology & Neuroscience, King's College London, De Crespigny Park, Denmark Hill, London, SE5 8AF, UK

<sup>6</sup>Research Centre of Applied and Preventive Cardiovascular Medicine, University of Turku, Turku, Finland

<sup>7</sup>Department of Internal Medicine, Satakunta Central Hospital, Pori, Finland

<sup>8</sup>Centre for Global Health Research, Usher Institute of Population Health Sciences and Informatics, University of Edinburgh, Teviot Place, Edinburgh, EH8 9AG, Scotland.

<sup>9</sup>Max Planck Institute for Molecular Genetics, Berlin, Germany

<sup>10</sup>Cardiovascular Health Research Unit, Department of Medicine, University of Washington, Seattle, Washington, USA

<sup>11</sup>Department of Psychiatry, Icahn School of Medicine at Mount Sinai, New York, NY, USA

<sup>12</sup>Mental Illness Research, Education, and Clinical Center (VISN 3), James J. Peters VA Medical Center, Bronx, NY, USA

<sup>13</sup>Department of Psychiatry, Brigham and Women's Hospital; Harvard Medical School, Boston, MA USA

<sup>14</sup>NORMENT, K.G. Jebsen Centre for Psychosis Research, University of Bergen, Bergen, Norway

<sup>15</sup>Dr. Einar Martens Research Group for Biological Psychiatry, Center for Medical Genetics and Molecular Medicine, Haukeland University Hospital, Bergen, Norway

<sup>16</sup>Center for Psychiatric Neuroscience, Feinstein Institute for Medical Research, Manhasset, NY, USA

<sup>17</sup>Department of Medical Genetics, Oslo University Hospital, University of Bergen, Oslo, Norway

<sup>18</sup>Department of Psychology, University of Oslo, Oslo, Norway

<sup>19</sup>Division of Mental Health and Addiction, Oslo University Hospital, Oslo, Norway

<sup>20</sup>Department of Psychology, University of Crete, Greece

<sup>21</sup>Department of Psychiatry, University of California, San Diego, La Jolla, CA, USA

<sup>22</sup>Center for Behavior Genetics of Aging, University of California, San Diego, La Jolla, CA, USA

<sup>23</sup>Medical Research Council Human Genetics Unit, Institute of Genetics and Molecular Medicine, University of Edinburgh, Edinburgh EH4 2XU, UK

<sup>24</sup>Generation Scotland, Centre for Genomic and Experimental Medicine, University of Edinburgh

<sup>25</sup>Clinical Division of Neurogeriatrics, Department of Neurology, Medical University of Graz, Austria

<sup>26</sup>Institute of Medical Informatics, Statistics and Documentation, Medical University of Graz, Austria

<sup>27</sup>Department of Epidemiology, Erasmus University Medical Center, Rotterdam, The Netherlands

<sup>28</sup>Department of Radiology and Nuclear Medicine, Erasmus University Medical Center, Rotterdam, The Netherlands

<sup>29</sup>Department of Neurology, Erasmus University Medical Center, Rotterdam, The Netherlands

<sup>30</sup>Department of Medical Epidemiology and Biostatistics, Karolinska Institutet, Stockholm, Sweden

<sup>31</sup>Department of Psychiatry, Yale University School of Medicine, New Haven, CT, USA

<sup>32</sup>Department of Psychology and Logopedics, Faculty of Medicine, University of Helsinki, Helsinki, Finland

<sup>33</sup>Helsinki Collegium for Advanced Studies, University of Helsinki, Helsinki, Finland

<sup>34</sup>Department of Psychiatry and Psychotherapy, University of Cologne, Cologne, Germany

<sup>35</sup>Department of Biostatistics, Boston University School of Public Health, Boston, MA, USA

<sup>36</sup>Centre for Healthy Brain Ageing, School of Psychiatry, University of New South Wales, Sydney, Australia

<sup>37</sup>Neuroimaging, Cognition & Genomics (NICOG) Centre, School of Psychology and Discipline of Biochemistry, National University of Ireland Galway, Ireland

<sup>38</sup>Medical Research Institute and Faculty of Health, University of Newcastle, New South Wales, Australia

<sup>39</sup>Institute for Molecular Medicine Finland (FIMM), University of Helsinki, Helsinki, Finland

<sup>40</sup>Centre for Epidemiology, Division of Population Health, Health Services Research & Primary Care, The University of Manchester

<sup>41</sup>Department of Epidemiology and Biostatistics, School of Public Health, Imperial College London, London, W2 1PG, UK

<sup>42</sup>Department of Psychology, University of California Riverside, Riverside, CA, USA

<sup>43</sup>University of Bordeaux, Bordeaux Population Health Research Center, INSERM UMR 1219, F-33000 Bordeaux, France

<sup>44</sup>Institute for Medical Informatics, Statistics and Epidemiology, University of Leipzig

<sup>45</sup>LIFE - Leipzig Research Center for Civilization Diseases, University of Leipzig

<sup>46</sup>Department of Epidemiology, School of Public Health, University of Michigan, Ann Arbor, MI, 48109

<sup>47</sup>Survey Research Center, Institute for Social Research, University of Michigan, Ann Arbor, MI 48104

<sup>48</sup>Icelandic Heart Association, Kopavogur, Iceland

<sup>49</sup>University of Iceland, Reykjavik, Iceland

<sup>50</sup>Department of Respiratory Medicine, Ghent University Hospital, De Pintelaan 185, 9000 Ghent, Belgium

<sup>51</sup>Section of Gerontology and Geriatrics, Department of Internal Medicine, Leiden University Medical Center, Leiden, the Netherlands

<sup>52</sup>Department of Medicine, Division of Geriatrics, University of Mississippi Medical Center, Jackson, MS

<sup>53</sup>Queensland Brain Institute, University of Queensland, Brisbane, Australia

<sup>54</sup>Centre for Advanced Imaging, University of Queensland, Brisbane, Australia

<sup>55</sup>Rush Alzheimer's Disease Center, Rush University Medical Center, Chicago, IL, USA

<sup>56</sup>Department of Neurological Sciences, Rush University Medical Center, Chicago, IL, USA

<sup>57</sup>National Ageing Research Institute, Royal Melbourne Hospital, Victoria, Australia

<sup>58</sup>Academic Unit for Psychiatry of Old Age, University of Melbourne, St George's Hospital, Kew, Australia

<sup>59</sup>Univ. Lille, Inserm, CHU Lille, Institut Pasteur de Lille, U1167 - LabEx DISTALZ, F-59000 Lille, France

<sup>60</sup>Department of Psychiatry, Medical Faculty, University of Cologne, Cologne, Germany

<sup>61</sup>Gen-Info LLC, Zagreb, Croatia

<sup>62</sup>Norwegian Centre for Mental Disorders Research (NORMENT), Institute of Clinical Medicine, University of Oslo, Oslo, Norway

<sup>63</sup>Mathematics and Statistics, Murdoch University, Perth, Australia

<sup>64</sup>Hunter Medical Research Institute and Faculty of Health University of Newcastle, New South Wales, Australia

<sup>65</sup>Department of Neurology, Bryan Alzheimer's Disease Research Center, and Center for Genomic and Computational Biology, Duke University Medical Center, Durham, NC, USA

<sup>66</sup>Psychiatry and Behavioral Sciences, Division of Medical Psychology, and Department of Neurology, Duke University Medical Center, Durham, NC, USA

<sup>67</sup>Department of Psychiatry, Johns Hopkins University School of Medicine, MD, Baltimore, USA

<sup>68</sup>McKusick-Nathans Institute of Genetic Medicine, Johns Hopkins University School of Medicine, MD, Baltimore, USA

<sup>69</sup>Institute of Human Genetics, University of Bonn, Bonn, Germany

<sup>70</sup>Department of Genomics, Life and Brain Center, University of Bonn, Bonn, Germany

<sup>71</sup>Departments of Behavioral Sciences, Rush University Medical Center, Chicago, IL, USA

<sup>72</sup>Dementia Centre for Research Collaboration, University of New South Wales, Sydney, NSW, Australia

<sup>73</sup>Department of Psychology, Yale University, New Haven, CT, USA

<sup>74</sup>Human Longevity Inc, Durham, NC, USA

<sup>75</sup>UCLA Semel Institute for Neuroscience and Human Behavior, Los Angeles, CA, USA

<sup>76</sup>23andMe, Inc., Mountain View, CA, USA

<sup>77</sup>Department of Cognitive Science, University of California, San Diego, La Jolla, CA, USA

<sup>78</sup>Department of Neurosciences, University of California, San Diego, La Jolla, CA, USA

<sup>79</sup>Department of Radiology, University of California, San Diego, La Jolla, CA, USA

<sup>80</sup>MRC-PHE Centre for Environment, School of Public Health, Imperial College London, London, W2 1PG, UK

<sup>81</sup>Department of Psychology, Virginia Commonwealth University, VA, USA

<sup>82</sup>Clinical and Translational Neuroscience Branch, Intramural Research Program, National Institute of Mental Health, National Institute of Health, Bethesda, MD, USA

<sup>83</sup>National Institute for Health and Welfare, Helsinki, Finland

<sup>84</sup>Department of General Practice and Primary Health Care, University of Helsinki, Helsinki, Finland

<sup>85</sup>Helsinki University Central Hospital, Unit of General Practice, Helsinki, Finland

<sup>86</sup>Folkhälsan Research Centre, Helsinki, Finland

<sup>87</sup>Department of Hygiene and Epidemiology, University of Ioannina Medical School, Ioannina, Greece

<sup>88</sup>Robertson Centre for Biostatistics, University of Glasgow, Glasgow, United Kingdom

<sup>89</sup>Department of Psychiatry, Martin Luther University of Halle-Wittenberg, Halle, Germany

<sup>90</sup>Virginia Institute for Psychiatric and Behavioral Genetics, Virginia Commonwealth University, Richmond, VA, USA

<sup>91</sup>QIMR Berghofer Medical Research Institute, Brisbane, Australia

<sup>92</sup>Department of Neurology, Johns Hopkins University School of Medicine, Baltimore, MD

<sup>93</sup>Department of Epidemiology, Johns Hopkins Bloomberg School of Public Health, Baltimore, MD

<sup>94</sup>Department of Data Science, University of Mississippi Medical Center, Jackson, MS

<sup>95</sup>Intramural Research Program National Institutes on Aging, National Institutes of Health, Bethesda, MD, USA

<sup>96</sup>Department of Psychiatry, National and Kapodistrian University of Athens Medical School, Eginition Hospital, Athens, Greece

<sup>97</sup>University Mental Health Research Institute, Athens, Greece

<sup>98</sup>Neurobiology Research Institute, Theodor-Theohari Cozzika Foundation, Athens, Greece

<sup>99</sup>Department of Epidemiology, University of North Carolina Gillings School of Global Public Health, Chapel Hill, NC

<sup>100</sup>Department of Clinical Physiology, Tampere University Hospital, and Finnish Cardiovascular Research Center, Tampere, Faculty of Medicine and Life Sciences, University of Tampere, Tampere 33521, Finland

<sup>101</sup>Department of Clinical Physiology, Finnish Cardiovascular Research Center - Tampere, Faculty of Medicine and Life Sciences, University of Tampere, Tampere 33014, Finland

<sup>102</sup>Department of Psychiatry and Psychotherapy, University of Bonn, Bonn, Germany

- <sup>103</sup>Department of Neurology, Mayo Clinic, Rochester, MN
- <sup>104</sup>Neuropsychiatric Institute, Prince of Wales Hospital, Sydney, Australia
- <sup>105</sup>Brain and Mind Centre - The University of Sydney, Camperdown, NSW, Australia 2050
- <sup>106</sup>School of Medical Sciences, University of New South Wales, Sydney, Australia
- <sup>107</sup>Department of Clinical Chemistry, Fimlab Laboratories, Finnish Cardiovascular Research Center - Tampere, Faculty of Medicine and Life Sciences, University of Tampere, Tampere 33014, Finland
- <sup>108</sup>Department of Clinical Chemistry, Finnish Cardiovascular Research Center - Tampere, Faculty of Medicine and Life Sciences, University of Tampere, Tampere 33014, Finland
- <sup>109</sup>Max Planck Institute for Human Development, Berlin, Germany
- <sup>110</sup>Technische Universität Dresden, Dresden, Germany
- <sup>111</sup>Department of Neurology, School of Medicine, University of Washington, Seattle, Washington, USA
- <sup>112</sup>Department of Epidemiology, University of Washington, Seattle, Washington, USA
- <sup>113</sup>Department of Neurology and Psychiatry, University of Pittsburgh, Pittsburgh, Pennsylvania, USA
- <sup>114</sup>Institute of Social Medicine, Occupational Health and Public Health (ISAP), University of Leipzig
- <sup>115</sup>LIFE - Leipzig Research Center for Civilization Diseases, University of Leipzig
- <sup>116</sup>Department of Biological and Medical Psychology, University of Bergen, Norway
- <sup>117</sup>Umeå Center for Functional Brain Imaging (UFBI), Umeå University, Sweden
- <sup>118</sup>Department of Statistics, USBE Umeå University, S-907 97 Umeå, Sweden
- <sup>119</sup>Institute for Molecular Bioscience, University of Queensland, Brisbane, Australia
- <sup>120</sup>The Institute of Medical Sciences, Aberdeen Biomedical Imaging Centre, University of Aberdeen, Aberdeen, AB25 2ZD, UK
- <sup>121</sup>Division of Brain Sciences, Department of Medicine, Imperial College, London, UK
- <sup>122</sup>Department of Radiation Sciences, Umeå University, Sweden
- <sup>123</sup>Department of Integrative Medical Biology, Umeå University, Sweden
- <sup>124</sup>Centre for Integrated Genomic Medical Research, Institute of Population Health, University of Manchester, Manchester, United Kingdom
- <sup>125</sup>Karolinska Institutet, Aging Research Center, Stockholm University, Stockholm, Sweden
- <sup>126</sup>Department of Psychology, School of Philosophy, Psychology and Language Sciences, The University of Edinburgh, Edinburgh, UK
- <sup>127</sup>Faculty of Medicine, University of Split, Split, Croatia
- <sup>128</sup>Department of Psychology, Stanford University, Palo Alto, CA, USA

<sup>129</sup>Cardiovascular Health Research Unit, Department of Medicine, University of Washington, Seattle, Washington, USA

<sup>130</sup>Department of Health Services, University of Washington, Seattle, Washington, USA

<sup>131</sup>Kaiser Permanente Washington Health Research Institute, Seattle, Washington, USA

<sup>132</sup>Department of Psychological and Brain Sciences, Indiana University, Indiana, USA

<sup>133</sup>Institute for Translational Genomics and Population Sciences, Los Angeles Biomedical Research Institute at Harbor-UCLA Medical Center

<sup>134</sup>Department of Pediatrics, Harbor-UCLA Medical Center, Torrance, California, USA

<sup>135</sup>Department of Genetics and Genomic Science and Institute for Multiscale Biology, Icahn School of Medicine at Mount Sinai, New York, NY, USA

<sup>136</sup>Mental Illness Research, Education, and Clinical Center (VISN 2), James J. Peters VA Medical Center, Bronx, NY, USA

<sup>137</sup>Institute of Molecular Biology and Biochemistry, Centre for Molecular Medicine, Medical University of Graz

<sup>138</sup>Robert and Beverly Lewis Center for Neuroimaging, University of Oregon, Eugene, OR, USA

<sup>139</sup>Department of Neurology, Boston University School of Medicine

<sup>140</sup>Department of Medical Biometry, Informatics and Epidemiology, University of Bonn, Bonn, Germany

<sup>141</sup>Laboratory of NeuroGenetics, Department of Psychology & Neuroscience, Duke University, Durham, NC, USA

<sup>142</sup>Department of Molecular Epidemiology, Leiden University Medical Center, Leiden, the Netherlands

<sup>143</sup>Department of Cardiovascular and Medical Sciences, University of Glasgow, Glasgow, United Kingdom

<sup>144</sup>Lieber Institute for Brain Development, Johns Hopkins University Medical Campus, Baltimore, MD, USA

<sup>145</sup>Department of Hygiene and Epidemiology, University of Ioannina Medical School, Ioannina, Greece

<sup>146</sup>Department of Public Health, University Hospital of Bordeaux, France

<sup>147</sup>Department of Internal Medicine, Erasmus Medical Center, Rotterdam, The Netherlands

<sup>148</sup>Campbell Family Mental Health Institute, Centre for Addiction and Mental Health, University of Toronto, Toronto, Canada

<sup>149</sup>Department of Public Health, University of Helsinki, Helsinki, Finland

<sup>150</sup>German Center for Neurodegenerative Diseases (DZNE), Bonn, Germany

<sup>151</sup>McKusick-Nathans Institute of Genetic Medicine, Johns Hopkins University School of Medicine, MD, Baltimore, USA



- <sup>152</sup>Department of Psychiatry and Behavioral Sciences, Faculty of Medicine, University of Crete, Heraklion, Crete, Greece
- <sup>153</sup>Human Genetics Center, School of Public Health, University of Texas Health Science Center at Houston, Houston, TX
- <sup>154</sup>Human Genome Sequencing Center, Baylor College of Medicine, Houston, TX
- <sup>155</sup>Neuropsychiatric Genetics Research Group, Department of Psychiatry and Trinity College Institute of Neuroscience, Trinity College Dublin, Dublin, Ireland
- <sup>156</sup>Center for Translational and Systems Neuroimmunology, Department of Neurology, Columbia University Medical Center, New York, NY, USA
- <sup>157</sup>Program in Medical and Population Genetics, Broad Institute, Cambridge, MA, USA
- <sup>158</sup>Department of Neurology, University Hospital of Bordeaux, France
- <sup>159</sup>Neuroimaging, Cognition & Genomics (NICOG) Centre, School of Psychology and Discipline of Biochemistry, National University of Ireland Galway, Ireland
- <sup>160</sup>Department of Global Health, University of Washington, Seattle, Washington, USA
- <sup>161</sup>Department of Cardiology, Leiden University Medical Center, Leiden, the Netherlands
- <sup>162</sup>Institute for Behavioral Genetics, University of Colorado, Boulder, Colorado
- <sup>163</sup>Wellcome Trust Sanger Institute, Wellcome Trust Genome Campus, Cambridge, UK
- <sup>164</sup>Department of Medical Genetics, University of Helsinki and University Central Hospital, Helsinki, Finland
- <sup>165</sup>Division of Neuroscience and Experimental Psychology, School of Biological Sciences, Manchester Academic Health Science Centre, and Manchester Medical School, Institute of Brain, Behaviour, and Mental Health, University of Manchester, Manchester, United Kingdom
- <sup>166</sup>Department of Clinical Physiology and Nuclear Medicine, Turku University Hospital, Turku, Finland
- <sup>167</sup>School of Medicine and Public Health, University of Newcastle, New South Wales, Australia
- <sup>168</sup>Neuroscience Research Australia, Sydney Australia
- <sup>169</sup>Faculty of Medicine, University of New South Wales, Sydney Australia
- <sup>170</sup>Alzheimer Scotland Dementia Research Centre, University of Edinburgh, Edinburgh, UK
- <sup>171</sup>Division of Nephrology and Hypertension, Department of Internal Medicine, Mayo Clinic, Rochester, MN, USA
- <sup>172</sup>Max Planck Institute for Human Cognitive and Brain Sciences, Leipzig
- <sup>173</sup>Day Clinic for Cognitive Neurology, University Hospital Leipzig, Leipzig
- <sup>174</sup>Division of Psychiatry Research, Zucker Hillside Hospital, Glen Oaks, NY, USA
- <sup>175</sup>Department of Psychiatry, Hofstra Northwell School of Medicine, Hempstead, New York
- <sup>176</sup>Division of Psychiatry, University of Edinburgh, Edinburgh, UK

<sup>177</sup>MRC Lifecourse Epidemiology Unit, University of Southampton, Southampton, UK.

<sup>178</sup>The National Heart, Lung, and Blood Institute's Framingham Heart Study, Framingham, MA, USA

<sup>179</sup>Department of Developmental Disability Neuropsychiatry, School of Psychiatry, University of New South Wales, Sydney, Australia

<sup>180</sup>Department of Radiology, Erasmus MC, Rotterdam, the Netherlands

<sup>181</sup>These authors contributed equally.

<sup>182</sup>These authors contributed equally.

Correspondence should be addressed to

Ian J. Deary, Department of Psychology, University of Edinburgh, Edinburgh EH8 9JZ, UK.

Tel. +44 131 650 3452

email [i.deary@ed.ac.uk](mailto:i.deary@ed.ac.uk)

Correspondence may be sent to either [i.deary@ed.ac.uk](mailto:i.deary@ed.ac.uk) or [Gail.Davies@ed.ac.uk](mailto:Gail.Davies@ed.ac.uk)

General cognitive function is a prominent human trait associated with many important life outcomes<sup>1,2</sup>, including longevity<sup>3</sup>. The substantial heritability of general cognitive function is known to be polygenic, but it has had little explication in terms of the contributing genetic variants<sup>4,5,6</sup>. Here, we combined cognitive and genetic data from the CHARGE and COGENT consortia, and UK Biobank (total N=280,360; age range = 16 to 102). We found 9,714 genome-wide significant SNPs ( $P < 5 \times 10^{-8}$ ) in 99 independent loci. Most showed clear evidence of functional importance. Among many novel genes associated with general cognitive function were *SGCZ*, *ATXN1*, *MAPT*, *AUTS2*, and *P2RY6*. Within the novel genetic loci were variants associated with neurodegenerative disorders, neurodevelopmental disorders, physical and psychiatric illnesses, brain structure, and BMI. Gene-based analyses found 536 genes significantly associated with general cognitive function; many were highly expressed in the brain, and associated with neurogenesis and dendrite gene sets. Genetic association results predicted up to 4% of general cognitive function variance in independent samples. There was significant genetic overlap between general cognitive function and information processing speed, as well as many health variables including longevity.

Since its discovery in 1904<sup>7</sup>, hundreds of studies have replicated the finding that around 40% of the variance in people's test scores on a diverse battery of cognitive tests can be accounted for by a single general factor<sup>8</sup>. General cognitive function is peerless among human psychological traits in terms of its empirical support and importance for life outcomes<sup>1,2</sup>. Individual differences in general cognitive function show phenotypic and genetic stability across most of the life course<sup>9-11</sup>. Twin studies find that general cognitive function has a heritability of more than 50% from adolescence through adulthood to older age<sup>4,12,13</sup>. SNP-based estimates of heritability for general cognitive function are about 20-30%<sup>5</sup>. To date, little of this substantial heritability has been explained; only a few relevant genetic loci have been discovered (**Table 1** and **Fig. 1**). Like other highly polygenic traits,

a limitation on uncovering relevant genetic loci is sample size<sup>14</sup>; to date, there have been fewer than 100,000 individuals in studies of general cognitive function<sup>5,6</sup>.

General cognitive function, unlike height for example, is not measured the same way in all samples. Here, this was mitigated by applying a consistent method of extracting a general cognitive function component from cognitive test data in the cohorts of the CHARGE and COGENT consortia; all individuals were of European ancestry (**Supplementary Materials**). Cohorts' participants were required to have scores from at least three cognitive tests, each of which tested a different cognitive domain. Each cohort applied the same data reduction technique (principal component analysis) to extract a general cognitive component. Scores from the first unrotated principal component were used as the general cognitive function phenotype. Using a general cognitive function phenotype in a genetically informative design is supported by the observation that the well-established positive manifold of cognitive tests is best presented by a highly heritable higher-order latent general cognitive function phenotype that mediates genetic and environmental covariances among cognitive tests<sup>4,8,13</sup>. The psychometric characteristics of the general cognitive component from each cohort in the CHARGE consortium are shown in **Supplementary Materials**. In order to address the fact that different cohorts had applied different cognitive tests, we previously showed that two general cognitive function components extracted from different sets of cognitive tests on the same participants correlate highly<sup>5</sup>. The cognitive test from the large UK Biobank sample was the so-called 'fluid' test, a 13-item test of verbal-numerical reasoning, which has a high genetic correlation with general cognitive function<sup>15</sup>. With the CHARGE and COGENT samples' general cognitive function scores and UK Biobank's verbal-numerical reasoning scores (in two samples: assessment centre-tested, and online-tested), there were 280,360 participants included in the present report's genome-wide association study (GWAS) analysis. We performed two post-GWAS meta-analyses separately: first, on the CHARGE and COGENT cohorts; and, second, on UK Biobank's two samples. Prior to running the subsequent meta-analysis of CHARGE-COGENT with UK Biobank, the genetic correlation,

calculated using linkage disequilibrium score (LDSC) regression, was estimated at 0.82 (SE=0.02), indicating very substantial overlap between the genetic variants influencing general cognitive function in these two groups. We performed an inverse-variance weighted meta-analysis of CHARGE-COGENT and UK Biobank.

Genome-wide results for general cognitive function showed 9,714 significant ( $P < 5 \times 10^{-8}$ ) SNP associations, and 17,563 at a suggestive level ( $1 \times 10^{-5} > P > 5 \times 10^{-8}$ ); see **Fig. 2a** and **Supplementary Tables 3 and 4**. There were 120 independent lead SNPs identified by FUnctional MApping and annotation of genetic associations (FUMA)<sup>16</sup>. A comparison of these lead SNPs with results from the largest previous GWAS of cognitive function<sup>6</sup> and educational attainment<sup>17</sup>—which included a subsample of individuals contributing to the present study—confirmed that 4 and 12 of these, respectively, were genome-wide significant in the previous studies (Supplementary Table 14). Five SNPs in the present study were completely novel (i.e.,  $P > .05$  in these previous studies): rs7010173 (chromosome 8; intronic variant in *SGCZ*); rs179994 (chromosome 6; intronic variant in *ATXN1*), rs8065165 (chromosome 17; intronic variant 2KB upstream of *MAPT*); rs2007481 (chromosome 7; intronic variant in *AUTS2*); and rs188236525 (chromosome 11; intronic variant 2KB upstream of *P2RY6*). The 120 lead SNPs were distributed within 99 loci across all autosomal chromosomes. Using the GWAS catalog (<https://www.ebi.ac.uk/gwas/>) to look up each locus, only 12 of these loci had been reported previously for other GWA studies of cognitive function or educational attainment (novel loci are indicated in **Supplementary Table 16**). Therefore, our study uncovered 87 novel independent loci associated with cognitive function. Of the five completely novel loci, two of these are in/near interesting candidate genes: *MAPT* gene mutations are associated with neurodegenerative disorders such as Alzheimer’s disease and frontotemporal dementia<sup>18</sup>; and *AUTS2* is a candidate gene for neurological disorders such as autism spectrum disorder, intellectual disability, developmental delay<sup>19</sup>, and for alcohol consumption<sup>20,21</sup>. These general cognitive function-associated genes also showed significant gene associations in the gene-based tests (except for

*P2RY6*); see **Supplementary Table 7 and Fig. 2b** for the results for 536 genes that the present study finds to be significantly associated with general cognitive function.

For the 120 lead SNPs, a summary of previous SNP associations is listed in **Supplementary Table 15**. They have been associated with many physical (e.g., BMI, height, weight), medical (e.g., lung cancer, Crohn's disease, blood pressure), and psychiatric (e.g., bipolar disorder, schizophrenia, autism) traits, as well as with cognitive function and educational attainment (12 loci). Of the novel SNP associations, we highlight previous associations with autism/ADHD (3 loci), bipolar disorder/schizophrenia (14 loci), and infant head circumference/intracranial volume/subcortical brain region volumes (2 loci).

We sought to identify lead and tagged SNPs within the 99 significant genomic risk loci associated with general cognitive function that are potentially functional, using FUMA<sup>16</sup> (**Supplementary Table 16**). See online methods for further details. Seventy-nine of the genomic risk loci contained at least one SNP with a Combined Annotation Dependent Depletion (CADD) score > 12.37, indicating that they are likely to be deleterious SNPs. Sixty-five of the genomic risk loci contained at least one SNP with a RegulomeDB score < 3, indicating that they are likely to be involved in gene regulation. Ninety-seven of the loci contained at least one SNP with a minimum 15-core chromatin state score of < 8, indicating that they are located in an open chromatin state consistent with the SNP being in a regulatory region. Sixty-eight of the loci contained at least one eQTL. Of interest, rs1135840 in *CYP2D6* ( $P = 1.42 \times 10^{-11}$ ) is a non-synonymous SNP (Ser486Thr), that has previously been associated with the metabolism of several commonly-used drugs<sup>22</sup>.

MAGMA gene-set analysis identified two significant gene sets associated with general cognitive function: neurogenesis ( $P = 1.1 \times 10^{-7}$ ) and dendrite ( $P = 1.6 \times 10^{-6}$ ) (**Supplementary Table 18; see Online Methods**). Identification of these gene sets is consistent with genes associated with cognitive

function regulating the generation of cells within the nervous system, including the formation of neuronal dendrites. MAGMA gene-property analysis indicated that genes expressed in all brain regions—except the brain spinal cord and cervical c1—and genes expressed in the pituitary share a higher level of association with general cognitive function than genes not expressed in the brain or pituitary (**Fig. 3** and **Supplementary Tables 20 and 21**). The most significant enrichments were for genes expressed in the cerebellum and the brain's cortex.

We estimated the proportion of variance explained by all common SNPs in four of the largest individual samples, using univariate GCTA-GREML analyses (see Online Methods): English Longitudinal Study of Ageing (ELSA:  $N = 6,661$ ,  $h^2 = 0.12$ ,  $SE = 0.06$ ), Understanding Society ( $N = 7,841$ ,  $h^2 = 0.17$ ,  $SE = 0.04$ ), UK Biobank Assessment Centre ( $N = 86,010$ ,  $h^2 = 0.25$ ,  $SE = 0.006$ ), and Generation Scotland ( $N = 6,507$ ,  $h^2 = 0.20$ ,  $SE = 0.05^{23}$ ) (**Table 2**). Genetic correlations for general cognitive function amongst these cohorts, estimated using bivariate GCTA-GREML, ranged from  $r_g = 0.88$  to  $1.0$  (**Table 2**). There were slight differences in the test questions and the testing environment for the UK Biobank's 'fluid' (verbal-numerical reasoning) test in the assessment centre versus the online version. Therefore, we investigated the genetic contribution to the stability of individual differences in people's verbal-numerical reasoning using a bivariate GCTA-GREML analysis, including only those individuals who completed the test on both occasions (mean time gap = 4.93 years). We found a significant perfect genetic correlation of  $r_g = 1.0$  ( $SE = 0.02$ ).

We tested how well the genetic results from our CHARGE-COGENT-UK Biobank general cognitive function GWAS analysis accounted for cognitive test score variance in independent samples. We re-ran the GWAS analysis excluding three of the larger cohorts: ELSA, Generation Scotland, and Understanding Society. These new GWAS summary results were used to create polygenic profile scores in the three cohorts. The polygenic profile score for general cognitive function explained 2.37% of the variance in ELSA ( $\beta = 0.16$ ,  $SE = 0.01$ ,  $P = 1.40 \times 10^{-46}$ ), 3.96% in Generation Scotland ( $\beta =$

0.21, SE = 0.01,  $P = 3.87 \times 10^{-72}$ ), and 4.00% in Understanding Society ( $\beta = 0.21$ , SE = 0.01,  $P = 1.31 \times 10^{-81}$ ). Full results for all five thresholds are shown in **Supplementary Table 11**.

Using the CHARGE-COGENT-UK Biobank GWAS results, we tested the genetic correlations between general cognitive function and 25 health traits. Sixteen of the 25 health traits were significantly genetically correlated with general cognitive function (**Supplementary Table 12**). Novel genetic correlations were identified between general cognitive function and ADHD ( $r_g = -0.36$ , SE = 0.03,  $P = 3.91 \times 10^{-32}$ ), bipolar disorder ( $r_g = -0.09$ , SE = 0.04,  $P = 0.008$ ), major depression ( $r_g = -0.30$ , SE = 0.05,  $P = 4.13 \times 10^{-12}$ ), and longevity ( $r_g = 0.15$ , SE = 0.06,  $P = 0.014$ ).

We explored the genetic foundations of reaction time and its genetic association with general cognitive function. Reaction time is an elementary cognitive task that assesses a person's information processing speed. It is both phenotypically and genetically correlated with general cognitive function, and accounts for some of its association with health<sup>24,25</sup>. We note the limitation that the UK Biobank's reaction time variable is based on only four trials per participant. Full results and methods are in Supplementary materials. There were 330,069 individuals in the UK Biobank sample with both reaction time and genetic data. GWAS results for reaction time uncovered 2,022 significant SNPs in 42 independent genomic regions; 122 of these SNPs overlapped with general cognitive function, with 76 having a consistent direction of effect (sign test  $P = 0.008$ ) (**Supplementary Table 9**). These genomic loci showed clear evidence of functionality (**Supplementary Table 17**). Using gene-based GWA, 191 genes attained statistical significance (**Supplementary Table 8**), 28 of which overlapped with general cognitive function (**Supplementary Table 10**). Gene-sets constructed using expression data indicated a role for genes expressed in the brain (**Supplementary Tables 22 and 23; Supplementary Fig. 3**). There was a genetic correlation ( $r_g$ ) of 0.227 ( $P = 4.33 \times 10^{-27}$ ) between reaction time and general cognitive function. The polygenic score



for reaction time explained 0.43% of the general cognitive function variance in ELSA ( $P = 1.42 \times 10^{-9}$ ), 0.56 % in Generation Scotland ( $P = 2.49 \times 10^{-11}$ ), and 0.26% in Understanding Society ( $P = 1.50 \times 10^{-6}$ ).

People with higher general cognitive function are broadly healthier<sup>26, 27</sup>; here, we find overlap between genetic loci for general cognitive function and a number of physical health traits. These shared genetic associations may reflect a causal path from cognitive function to disease, cognitive consequences of disease, or pleiotropy<sup>28</sup>. For psychiatric illness, conditions like schizophrenia (and, to a lesser extent, bipolar disorder) are characterised by cognitive impairments<sup>29</sup>, and thus reverse causality (i.e. from cognitive function to disease) is less likely. In terms of localising more proximal structural and functional causes of variation in cognitive function, researchers could prioritise the genetic loci uncovered here that overlap with brain-related measures.

General cognitive function has prominence and pervasiveness in the human life course, and it is important to understand the environmental and genetic origins of its variation in the population<sup>4</sup>. The unveiling here of many new genetic loci, genes, and genetic pathways that contribute to its heritability (**Supplementary Tables 3, 7 and 18; Fig. 2**)—which it shares, as we find here, with many health outcomes, longevity, brain structure, and processing speed—provides a foundation for exploring the mechanisms that bring about and sustain cognitive efficiency through life.

## Acknowledgments

This research was conducted in The University of Edinburgh Centre for Cognitive Ageing and Cognitive Epidemiology, funded by the Biotechnology and Biological Sciences Research Council and Medical Research Council (MR/K026992/1). This research was conducted using the UK Biobank Resource (Application Nos. 10279 and 4844). Cohort-specific acknowledgements are in the Supplementary Materials.

## **Author Disclosure**

Anders Dale is a Founder of and holds equity in CorTechs Labs, Inc., and serves on its Scientific Advisory Board. He is a member of the Scientific Advisory Board of Human Longevity, Inc., and receives funding through research agreements with General Electric Healthcare and Medtronic, Inc. The terms of these arrangements have been reviewed and approved by UCSD in accordance with its conflict of interest policies. Bruce Psaty serves on a DSMB for a clinical trial of a device funded by the manufacturer (Zoll LifeCor), and on the steering committee of the Yale Open Data Access Project funded by Johnson & Johnson. Ian Deary is a participant in UK Biobank.

## **Contributions**

GD and IJD drafted the manuscript with contributions from M Luciano, SEH, WDH, SJR, SPH, CF-R, and JO. GD, JWT and M Lam performed quality control of the CHARGE-COGENT data. IJD designed and overviewed the cognitive psychometric analyses in the CHARGE cohorts. GD and REM performed quality control of UK Biobank data. GD, JWT and M Lam analysed the data. SEH, WDH, SPH and M Luciano performed/assisted with downstream analysis. GD and IJD co-ordinated the CHARGE and UK Biobank work, and their integration with COGENT; TL, JWT and M Lam co-ordinated the COGENT work. All authors supplied phenotype data, genotype data, and GWA results, and commented on and approved the manuscript.

1. Brand, C. The importance of human intelligence. In *Arthur Jensen: consensus and controversy* (S. Modgil & C. Modgil, eds.) 297 (1987, Routledge).
2. Deary, I. J. Intelligence. *Ann. Rev. Psychol.* **63**, 453-482 (2012).
3. Calvin, C., *et al.* (2017). Childhood intelligence in relation to major causes of death in 68 year follow-up: prospective population study. *BMJ* **357**, j2708 (2017).
4. Plomin, R., & Deary, I. J. Genetics and intelligence differences: five special findings. *Mol. Psychiatr.* **20**, 98-108 (2015).
5. Davies, G., *et al.* Genome-wide association study of cognitive functions and educational attainment in UK Biobank (N = 112 151). *Mol. Psychiatr.* **21**, 758-767 (2016).
6. Sniekers, S., *et al.* Genome-wide association meta-analyses of 78,308 individuals identifies new loci and genes influencing human intelligence. *Nat. Genet.* **49**, 1107-1112 (2017).
7. Spearman, C. "General Intelligence" objectively determined and measured. *Am. J. Psychol.* **15**, 201-293 (1904).
8. Carroll, J. B. *Human Cognitive Abilities: A Survey of Factor Analytic Studies*. (1993, Cambridge University Press).
9. Deary, I. J. The stability of intelligence from childhood to old age. *Curr. Direct. Psychol. Sci.* **23**, 239-245 (2014).
10. Deary, I. J., *et al.* Genetic contributions to stability and change in intelligence from childhood to old age. *Nature* **482**, 212–215 (2012).
11. Lyons, M. J., *et al.* A longitudinal twin study of general cognitive ability over four decades. *Dev. Psychol.* **53**, 1170-1177 (2017).
12. Haworth, C. M. *et al.* The heritability of general cognitive ability increases linearly from childhood to young adulthood. *Mol. Psychiatr.* **15**, 1112-1120 (2010).
13. Tucker-Drob, E. M., Briley, D. A., & Harden, K. P. (2013). Genetic and environmental influences on cognition across development and context. *Curr. Direct. Psychol. Sci.* **22**, 349-355 (2013).

14. Visscher, P. M. *et al.* 10 years of GWAS discovery: biology, function, and translation. *Am. J. Hum. Genet.* **101**, 5-22 (2017).
15. Hill, W. D., *et al.* Molecular genetic aetiology of general cognitive function is enriched in evolutionarily conserved regions. *Transl. Psychiatr.* **6**, e980 (2016).
16. Watanabe, K., Taskesen, E., van Bochoven, A., & Posthuma, D. FUMA: Functional mapping and annotation of genetic associations. *bioRxiv* doi:10.1101/110023 (2017).
17. Okbay, A., *et al.* Genome-wide association study identifies 74 loci associated with educational attainment. *Nature*, **533**, 539-542 (2016).
18. Zhang, C. C. *et al.* Meta-analysis of the association between variants in MAPT and neurodegenerative diseases. *Oncotarget* **8**, 44994-45007 (2017).
19. Oksenberg, N., & Ahituv, N. The role of *AUTS2* in neurodevelopment and human evolution. *Trends Genet.* **29**, 600-608 (2013).
20. Schumann, G., *et al.* KLB is associated with alcohol drinking, and its gene product  $\beta$ -Klotho is necessary for FGF21 regulation of alcohol preference. *Proc. Natl. Acad. Sci. USA* **113**, 14372-14377 (2016).
21. Schumann, G., *et al.* Genome-wide association and genetic functional studies identify autism susceptibility candidate 2 gene (*AUTS2*) in the regulation of alcohol consumption. *Proc. Natl. Acad. Sci. USA* **108**, 7119-7124 (2011).
22. Johansson I, Lundqvist E, Bertilsson L, Dahl ML, Sjöqvist F, Ingelman-Sundberg M. *Proc. Natl. Acad. Sci. U S A.* **90**, 11825-11829 (1993).
23. Marioni, R. E., *et al.* Molecular genetic contributions to socioeconomic status and intelligence. *Intelligence* **44**, 26-32 (2014).
24. Deary, I. J., & Der, G. Reaction time explains IQ's association with death. *Psychol. Sci.* **16**, 64-69 (2005).
25. Luciano, M. *et al.* (2001). Genetic covariance among measures of information processing speed, working memory, and IQ. *Behav. Genet.* **31**, 581-592 (2001).

26. Der G, Batty GD, & Deary IJ. The association between IQ in adolescence and a range of health outcomes at 40 in the 1979 US National Longitudinal Study of Youth. *Intelligence* **37**, 573-580 (2009).
27. Wrulich, M. *et al.* Forty years on: Childhood intelligence predicts health in middle adulthood. *Health Psychol.* **33**, 292-296 (2014).
28. Deary, I. J. Looking for 'system integrity' in cognitive epidemiology. *Gerontology* **58**, 545-553 (2012).
29. Bortolato, B., Miskowiak, K. W., Köhler, C. A., Vieta, E., & Carvalho, A. F. Cognitive dysfunction in bipolar disorder and schizophrenia: a systematic review of meta-analyses. *Neuropsychiatr. Dis. Treat.* **11**, 3111-3125 (2015).
30. Davies, G., *et al.* Genome-wide association studies establish that human intelligence is highly heritable and polygenic. *Mol Psychiatr.* **16**, 996-1005 (2011).
31. Lencz, T. *et al.* Molecular genetic evidence for genetic overlap between general cognitive ability and risk for schizophrenia: A report from the cognitive genomics consortium (COGENT). *Mol Psychiatr.* **19**, 168-174 (2014).
32. Benyamin, B., *et al.* Childhood intelligence is heritable, highly polygenic and associated with *FNBP1L*. *Mol. Psychiatr.* **19**, 253-258 (2014).
33. Kirkpatrick, R. M., McGue, M., Iacono, W. G., Miller, M. B., & Basu, S. (2014). Results of a "GWAS Plus:" General cognitive ability is substantially heritable and massively polygenic. *PLOS ONE* **9**, e112390.
34. Davies, G., *et al.* Genetic contributions to variation in general cognitive function: a meta-analysis of genome-wide association studies in the CHARGE consortium (N= 53 949). *Mol Psychiatr* **20**, 183-192 (2015).
35. Trampush, J. W., *et al.* GWAS meta-analysis reveals novel loci and genetic correlates for general cognitive function: a report from the COGENT consortium. *Mol Psychiatr.* **22**, 336 (2017).

## Online Methods

### *Participants and Cognitive Phenotypes*

This study includes 280,360 individuals of European ancestry from 57 population-based cohorts brought together by the Cohorts for Heart and Aging Research in Genomic Epidemiology (CHARGE), the Cognitive Genomics Consortium (COGENT) consortia, and UK Biobank. All individuals were aged between 16 and 102 years. Exclusion criteria included clinical stroke (including self-reported stroke) or prevalent dementia.

For each of the CHARGE and COGENT cohorts, a general cognitive function component phenotype was constructed from a number of cognitive tasks. Each cohort was required to have tasks that tested at least three different cognitive domains. Principal component analysis was applied to the cognitive test scores to derive a measure of general cognitive function. Principal component analyses results for the CHARGE cohorts were checked by one author (IJD) to establish the presence of a single component. Scores on the first unrotated component were used as the cognitive phenotype (general cognitive function). UK Biobank participants were asked 13 multiple-choice questions that assessed verbal and numerical reasoning (VNR: UK Biobank calls this the ‘fluid’ test). The score was the number of questions answered correctly in two minutes. Two samples of UK Biobank participants with verbal-numerical reasoning scores were used in the current analysis. The first sample (VNR Assessment Centre) consists of UK Biobank participants who completed the verbal-numerical reasoning test at baseline in assessment centres (n = 107,586). The second sample (VNR Web-Based) consists of participants who did not complete the verbal-numerical reasoning test at baseline but did complete this test during the web-based cognitive assessment online (n = 54,021). Details of the cognitive phenotypes for all cohorts can be found in Supplementary Information Section 2.

At the baseline UK Biobank assessment, 496,790 participants completed the reaction time test. Details of the test can be found in Supplementary Information Section 2. A sample of 330,069 UK Biobank participants with both scores on the reaction time test and genotyping data was used in this study.

### *Genome-wide association analyses*

Genotype–phenotype association analyses were performed within each cohort, using an additive model, on imputed SNP dosage scores. Adjustments for age, sex, and population stratification, if required, were included in the model. Cohort-specific covariates—for example, site or familial relationships—were also fitted as required. Cohort specific quality control procedures, imputation methods, and covariates are described in Supplementary Table S2. Quality control of the cohort-level summary statistics was performed using the EasyQC software<sup>36</sup>, which implemented the exclusion of SNPs with imputation quality < 0.6 and minor allele count < 25.

### *Meta-analysis*

A meta-analysis of the 56 CHARGE-COGENT cohorts was performed using the METAL package with an inverse variance weighted model implemented and single genomic control applied (<http://www.sph.umich.edu/csg/abecasis/Metal>). The two UK Biobank groups, VNR Assessment Centre and VNR Web-Based, were also meta-analysed using the same method. An inverse-variance weighted meta-analysis of the CHARGE-COGENT and UK Biobank summary results was then performed.

### *Reaction Time Genome-wide association analysis*

The GWAS of reaction time from the UK Biobank sample was performed using the BGENIE v 1.2 analysis package (<https://jmarchini.org/bgenie/>). A linear SNP association model was tested which accounted for genotype uncertainty. Reaction time was adjusted for the following covariates; age, sex, genotyping batch, genotyping array, assessment centre, and 40 principal components.

### *Gene-based analysis (MAGMA)*

Gene-based analysis was conducted using MAGMA<sup>37</sup>. All SNPs that were located within protein coding genes were used to derive a *P*-value describing the association found with general cognitive function and reaction time. The SNP-wise model from MAGMA was used and the NCBI build 37 was used to determine the location and boundaries of 18,199 autosomal genes. Linkage disequilibrium within and between each gene was gauged using the 1000 genomes phase 3 release<sup>38</sup>. A Bonferroni correction was applied to control for multiple testing; the genome-wide significance threshold was  $P < 2.75 \times 10^{-6}$ .

### *Estimation of SNP-based heritability*

Univariate GCTA-GREML analyses<sup>39</sup> were used to estimate the proportion of variance explained by all common SNPs in four of the largest individual cohorts: ELSA, Understanding Society, UK Biobank, and Generation Scotland. Sample sizes for all of the GCTA analyses in these cohorts differed from the association analyses, because one individual was excluded from any pair of individuals who had an estimated coefficient of relatedness of  $> 0.025$  to ensure that effects due to shared environment were not included. The same covariates were included in all GCTA-GREML analyses as for the SNP-based association analyses.



### *Univariate Linkage Disequilibrium Score Regression (LDSC)*

Univariate LDSC regression was performed on the summary statistics from the GWAS on general cognitive function and reaction time. The heritability Z-score provides a measure of the polygenic signal found in each data set. Values greater than 4 indicate that the data are suitable for use with bivariate LDSC regression<sup>40</sup>. The mean  $\chi^2$  statistic indicates the inflation of the GWAS test statistics that, under the null hypothesis of no association (i.e. no inflation of test statistics), would be 1. For each GWAS, an LD regression was carried out by regressing the GWA test statistics ( $\chi^2$ ) on to each SNP's LD score (the sum of squared correlations between the minor allele frequency count of a SNP with the minor allele frequency count of every other SNP).

### *Genetic correlations*

Genetic correlations were estimated using two methods, bivariate GCTA-GREML<sup>41</sup> and LDSC<sup>40</sup>. Bivariate GCTA was used to calculate genetic correlations between phenotypes and cohorts where the genotyping data were available. This method was used to calculate the genetic correlations between different cohorts for the general cognitive function phenotype. It was also employed to investigate the genetic contribution to the stability of UK Biobank's participants' verbal-numerical reasoning test scores in the assessment centre and then in web-based, online testing. In cases where only GWA summary results were available, LDSC was used to estimate genetic correlations between two traits—for example, general cognitive function and longevity—in order to estimate the degree of overlap between polygenic architecture of the traits. Genetic correlations were estimated between general cognitive function and reaction time and a number of health outcomes.

### *Polygenic prediction*

Polygenic profile score analysis was used to predict cognitive test performance in Generation Scotland, the English Longitudinal Study of Ageing, and Understanding Society. Polygenic profiles were created in PRSice<sup>42</sup> using results of a general cognitive function meta-analysis that excluded the Generation Scotland, the English Longitudinal Study of Ageing, and Understanding Society cohorts. Polygenic profiles were also created based on the UK Biobank GWA reaction time results.

### *Functional Annotation and Loci Discovery*

Genomic risk loci were derived using FUNctional MApping and annotation of genetic associations (FUMA)<sup>16</sup>. Firstly, independent significant SNPs were identified using the SNP2GENE function and defined as SNPs with a  $P$ -value of  $\leq 5 \times 10^{-8}$  and independent of other genome wide significant SNPs at  $R^2 < 0.6$ . Using these independent significant SNPs, candidate SNPs to be used in subsequent annotations were identified as all SNPs that had a  $MAF \geq 0.0005$  and were in LD of  $R^2 \geq 0.6$  with at least one of the independent significant SNPs. These candidate SNPs included those from the 1000 genomes reference panel and need not have been included in the GWAS performed in the current study. Lead SNPs were also identified using the independent significant SNPs and were defined as those that were independent from each other at  $R^2 < 0.1$ . Genomic risk loci that were 250kb or closer were merged into a single locus.

The lead SNPs and those in LD with the lead SNPs were then mapped to genes based on the functional consequences of genetic variation of the lead SNPs which was measured using ANNOVAR<sup>43</sup> and the Ensembl genes build 85. Intergenic SNPs were mapped to the two closest up- and down-stream genes which can result in their being assigned to multiple genes. All SNPs found in 1000 genomes phase 3 were then annotated with a CADD score<sup>44</sup>, RegulomeDB score<sup>45</sup>, and 15-core chromatin states<sup>46-48</sup>.

The mapping of eQTLs was performed using each independent significant SNP and those in LD with it. eQTL information was obtained from the following databases: GTEx (<http://www.gtexportal.org/home/>), BRAINEAC (<http://www.braineac.org/>), Blood eQTL Browser (<http://genenetwork.nl/bloodqtlbrowser/>), and BIOS QTL browser (<http://genenetwork.nl/biosqtlbrowser/>).

### *Gene-set analysis*

Gene-set analysis was conducted in MAGMA<sup>37</sup> using competitive testing, which examines if genes within the gene set are more strongly associated with each of the cognitive phenotypes than other genes. Such competitive tests have been shown to control for Type 1 error rate as well as facilitating an understanding of the underlying biology of cognitive differences<sup>49,50</sup>. A total of 10 891 gene-sets (sourced from Gene Ontology<sup>51</sup>, Reactome<sup>52</sup>, and, SigDB<sup>53</sup>) were examined for enrichment of intelligence. A Bonferroni correction was applied to control for the multiple tests performed on the 10,891 gene sets available for analysis.

### *Gene property analysis*

In order to indicate the role of particular tissue types that influence differences in general cognitive function and reaction time, a gene property analysis was conducted using MAGMA. The goal of this analysis was to determine if, in 30 broad tissue types and 53 specific tissues, tissue-specific differential expression levels were predictive of the association of a gene with general cognitive function and reaction time. Tissue types were taken from the GTEx v6 RNA-seq database<sup>54</sup> with expression values being log2 transformed with a pseudocount of 1 after winsorising at 50, with the average expression value being taken from each tissue. Multiple testing was controlled for using a Bonferroni correction.

36. Winkler, T.W. *et al.* Quality control and conduct of genome-wide association meta-analyses. *Nat. Protoc.* **9**, 1192–1212 (2014).
37. de Leeuw, C. A., Mooij, J. M., Heskes, T., & Posthuma, D. MAGMA: Generalized Gene-Set Analysis of GWAS Data. *PLoS Comp Biol* **11**, e1004219 (2015).
38. 1000 Genomes Project Consortium. A map of human genome variation from population-scale sequencing. *Nature* **467**, 1061-1073 (2012).
39. Yang, J., *et al.* Common SNPs explain a large proportion of the heritability for human height. *Nat. Genet.* **42**, 565-569 (2010).
40. Bulik-Sullivan, B., *et al.* An atlas of genetic correlations across human diseases and traits. *Nat. Genet.* **47**, 1236-1241 (2015).
41. Lee, S. H., Yang, J., Goddard, M. E., Visscher, P. M., & Wray, N. R. Estimation of pleiotropy between complex diseases using SNP-derived genomic relationships and restricted maximum likelihood. *Bioinformatics* **28**, 2540-2542 (2012).
42. Euesden, J., Lewis, C. M., & O'Reilly, P. F. PRSice: Polygenic Risk Score software. *Bioinformatics* 2015; **31**, 1466–1468 (2015).
43. Wang, K., Li, M., & Hakonarson, H. ANNOVAR: functional annotation of genetic variants from high-throughput sequencing data. *Nucleic Acids Res.* **38**, e164-e164 (2010).
44. Kircher, M., *et al.* A general framework for estimating the relative pathogenicity of human genetic variants. *Nat. Genet.* **46**, 310-315 (2014).
45. Boyle, A. P., *et al.* Annotation of functional variation in personal genomes using RegulomeDB. *Genome Res.* **22**, 1790-1797 (2012).
46. ENCODE Project Consortium. An integrated encyclopedia of DNA elements in the human genome. *Nature* **489**, 57-74 (2012).
47. Ernst, J., & Kellis, M. ChromHMM: automating chromatin-state discovery and characterization. *Nat. Methods* **9**, 215-216 (2012).

48. Kundaje, A., *et al.* Integrative analysis of 111 reference human epigenomes. *Nature* **518**, 317-330 (2015).
49. Hill, W. D., *et al.* Human cognitive ability is influenced by genetic variation in components of postsynaptic signalling complexes assembled by NMDA receptors and MAGUK proteins. *Transl. Psychiatr.* **4**, e341 (2014).
50. de Leeuw, C. A., Neale, B. M., Heskes, T., Posthuma, D. The statistical properties of gene-set analysis. *Nat. Rev. Genet.* **17**, 353-364 (2016).
51. Ashburner, M., *et al.* Gene Ontology: tool for the unification of biology. *Nat. Genet.* **25**, 4 (2012).
52. Fabregat, A. *et al.* The reactome pathway knowledgebase. *Nucleic Acids Res.* **44**, D481-D487 (2015).
53. Subramanian, A., *et al.* Gene set enrichment analysis: a knowledge-based approach for interpreting genome-wide expression profiles. *Proc. Natl. Acad. Sci. USA* **102**, 15545-15550 (2005).
54. The GTEx Consortium. The Genotype-Tissue Expression (GTEx) pilot analysis: Multitissue gene regulation in humans. *Science* **348**, 648-660 (2015).

## Figure Captions

**Figure 1** Summary of molecular genetic association studies with general cognitive function to date.

**Figure 2** SNP-based (a) and gene-based (b) association results for general cognitive function in 280,360 individuals. The red line indicates the threshold for genome-wide significance:  $P < 5 \times 10^{-8}$  for (a),  $P < 2.75 \times 10^{-6}$  for (b); the blue line in (a) indicates the threshold for suggestive significance:  $P < 1 \times 10^{-5}$ .

**Figure 3** Functional analyses of general cognitive function association results, lead SNPs, and all SNPs in LD with lead SNPs. Functional consequences of SNPs on genes (a) indicated by functional annotation assigned by ANNOVAR. MAGMA gene-property analysis results; results are shown for average expression of 30 general tissue types (b) and 53 specific tissue types (c). The dotted line indicates the Bonferroni-corrected  $\alpha$  level.

**Table 1. Details of GWA studies of general cognitive function to date, including the present study**

| Author; doi                                                | Year | N       | GWAS-sig SNP hits      | GWAS-sig gene hits | SNP-based $h^2$ |
|------------------------------------------------------------|------|---------|------------------------|--------------------|-----------------|
| Davies et al., 2011 <sup>30</sup>                          | 2011 | 3511    | 0                      | 1 gene             | 0.51 (0.11)     |
| Lencz et al., 2013 <sup>31</sup>                           | 2013 | 5000    | 0                      | NA                 | NA              |
| Benyamin et al., 2014 <sup>32</sup>                        | 2014 | 17989   | 0                      | 0                  | 0.46 (0.06)     |
| Kirkpatrick et al. 2014 <sup>33</sup>                      | 2014 | 7100    | 0                      | 0                  | 0.35 (0.11)     |
| Davies et al. 2015 <sup>34</sup>                           | 2015 | 53,949  | 3 loci<br>(13 SNPs)    | 1 gene             | 0.29 (0.05)     |
| Davies et al. 2016 <sup>5</sup> ; results for 'fluid' test | 2016 | 36,035  | 3 loci<br>(149 SNPs)   | 7 loci<br>17 genes | 0.31 (0.02)     |
| Trampush et al., 2017 <sup>35</sup>                        | 2017 | 35,298  | 2 loci<br>(7 SNPs)     | 3 loci<br>7 genes  | 0.22 (0.01)     |
| Snieder et al., 2017 <sup>6</sup>                          | 2017 | 78,308  | 18 loci<br>(336 SNPs)  | 47 genes           | 0.20 (0.01)     |
| Davies et al., 2017; present study                         | 2017 | 280,360 | 99 loci<br>(9714 SNPs) | 536 genes          | 0.25 (0.006)    |

For SNP-based heritability, the value from the largest sample is given.

**Table 2. Genetic correlations and heritability estimates of a general cognitive function component in three United Kingdom cohorts**

| Cohort | ELSA        | US          | GS          |
|--------|-------------|-------------|-------------|
| ELSA   | 0.12 (0.06) |             |             |
| US     | 1.0 (0.33)  | 0.17 (0.04) |             |
| GS     | 1.0 (0.38)  | 0.88 (0.24) | 0.20 (0.05) |

Below the diagonal, genetic correlations (standard error) of general cognitive function amongst three cohorts are shown: English Longitudinal Study of Ageing (ELSA); Generation Scotland (GS); and Understanding Society (US). SNP-based heritability (standard error) estimates appear on the diagonal.



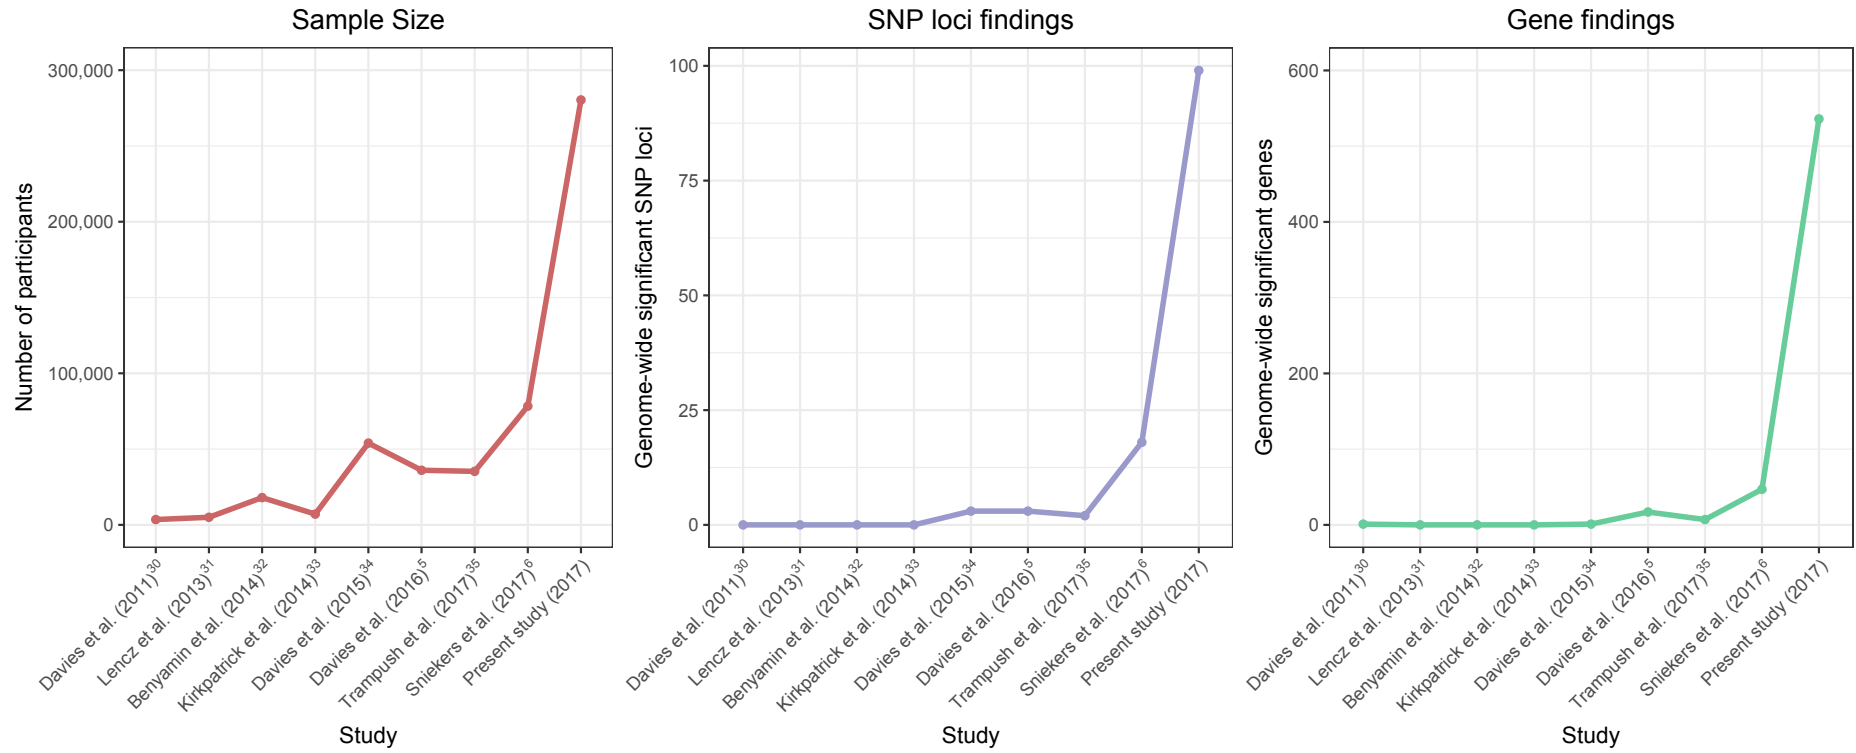

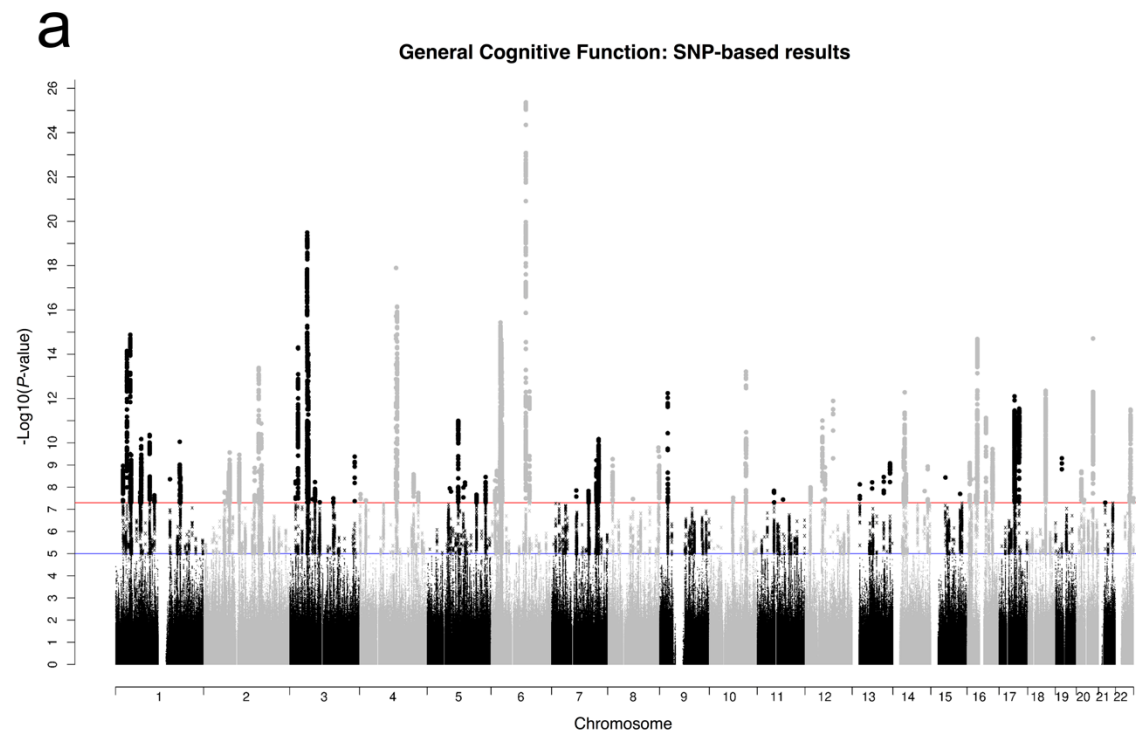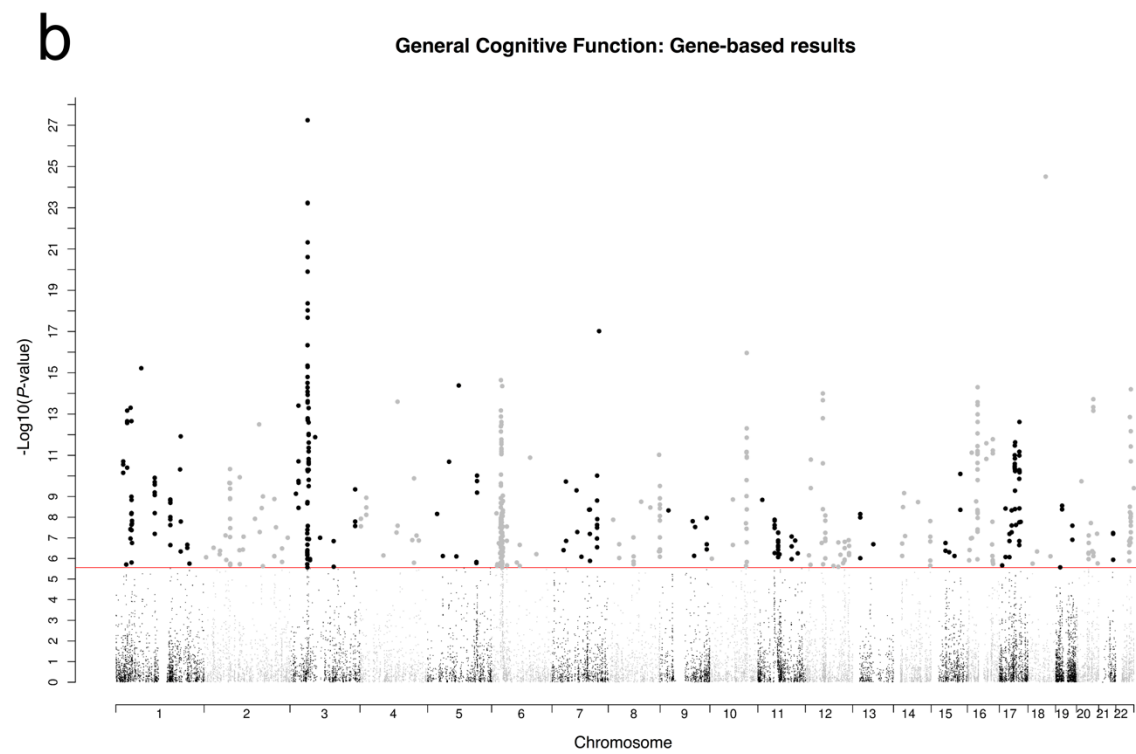

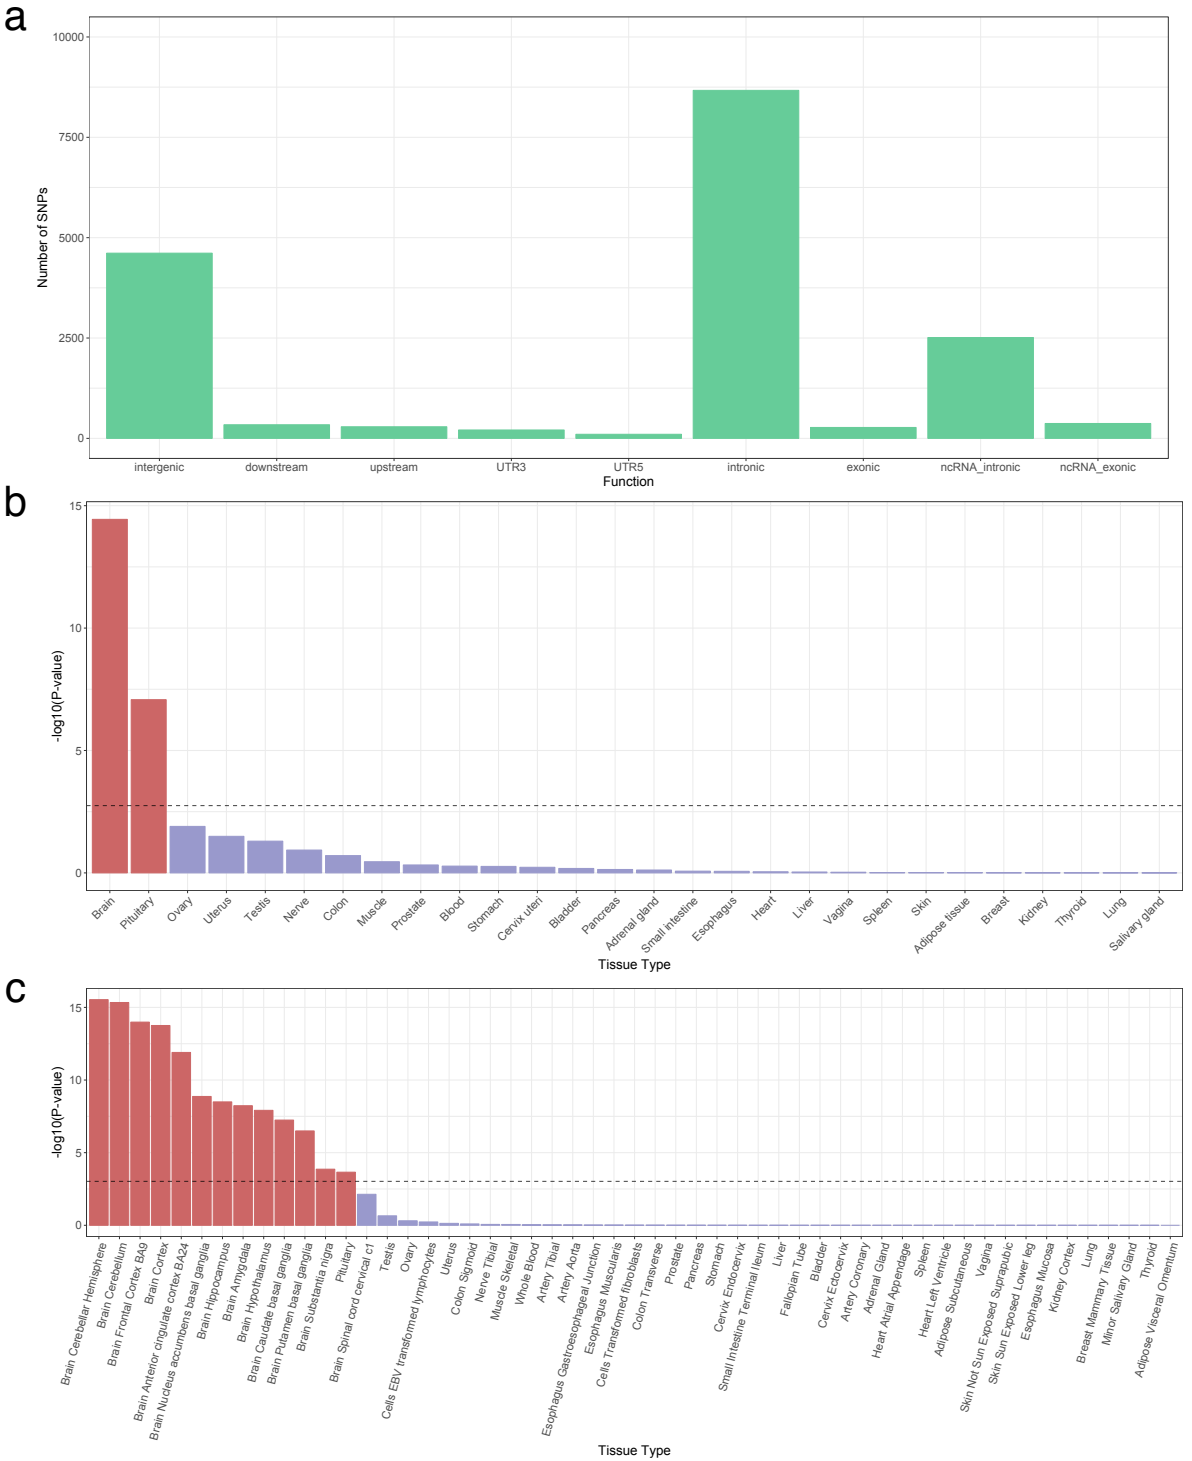

Source: http://www.biorxiv.org/content/10.1101/176511v2.full.pdf
